# Supplementary material
Source: PubMed Central journal article supplement (PMC2613466)
Supplement: JCI0935997sd.pdf [file JCI0935997sd.pdf]

# Supplemental Figure 1

A

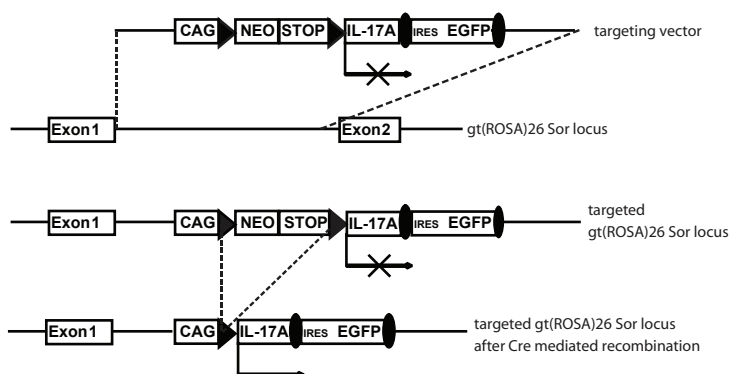

B

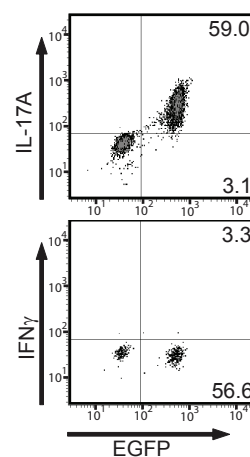

C

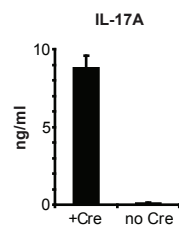

D

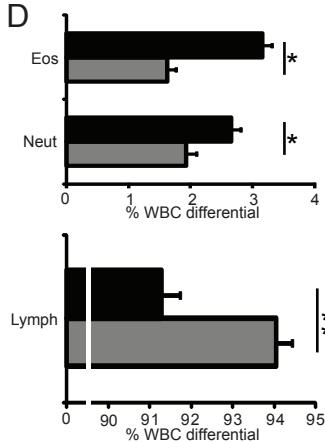

E

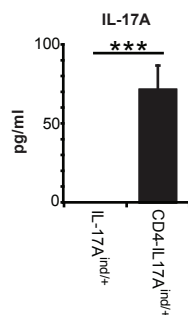

F

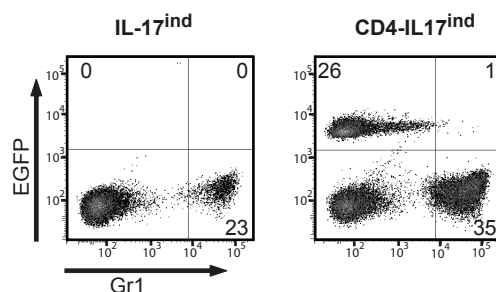

G

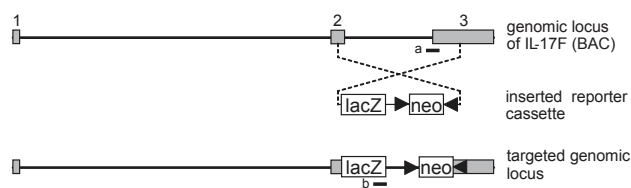

IL-17F

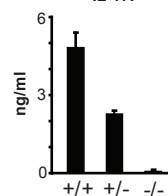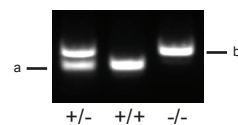

Supplemental Figure 2

A

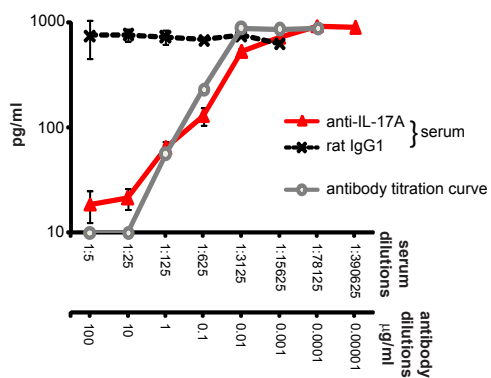

B

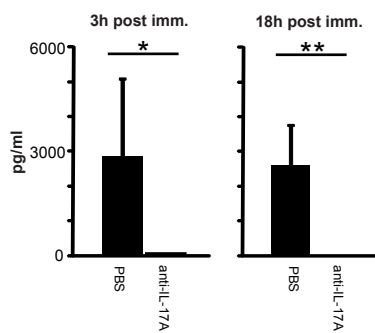

**Supplemental Figure 1** (A) Generation of the IL-17A<sup>ind</sup> allele was carried out using homologous recombination in embryonic stem cells (C57BL/6-Bruce 4). Our conditional 'knock-in' approach introduced the targeting construct into the endogenous gt(ROSA)26Sor locus. Upon Cre-mediated recombination, a lox-P-flanked transcriptional STOP cassette is excised 5' of an IL-17A cDNA insert and an IRES-EGFP element, allowing a dual expression of IL-17A and EGFP under the control of the chicken  $\beta$ -actin (CAG) promoter.

(B)  $1 \times 10^6$  whole lymph node cells from IL-17A<sup>ind/+</sup> mice were cultured for 4 h with or without (data not shown) Tat-Cre protein to induce IL-17A and EGFP expression in the presence of anti-CD3, anti-CD28 and IL-2. After 36 h, cells were briefly cultured with Brefeldin-A and stained for CD4 and either IL-17A or IFN $\gamma$ . Percentages of IL-17A<sup>+</sup>EGFP<sup>+</sup> and IFN- $\gamma$ <sup>+</sup>EGFP<sup>+</sup> cells are given in the quadrants. No EGFP was detected in wild type mice also treated with Tat-Cre (data not shown).

(C) LN cells were cultured as in B, and supernatants extracted after 36 h. IL-17A secretion was measured by ELISA.

(D) Peripheral blood was extracted from IL-17A<sup>ind/+</sup> and CD4-IL17A<sup>ind/+</sup> mice and subjected to routine WBC differential. Significant increase in neutrophil and eosinophil counts, and a decrease in peripheral blood lymphocytes are shown. (CD4-IL17A<sup>ind/+</sup> n=10, IL-17A<sup>ind/+</sup> n=9).

(E) Serum from IL-17A<sup>ind/+</sup> and CD4-IL17A<sup>ind/+</sup> mice was extracted at d14 after immunization with MOG/CFA. Shown are levels of IL-17A detectable in serum isolated from peripheral blood (n=5). Spleen cells from the same mice were stained for Gr1. Quadrant statistics are shown.

(F) Spleen-derived single cell suspension were obtained from the indicated genotypes d14 after MOG/CFA immunization. Percentages of Gr1<sup>+</sup> cells are shown in the histograms.

(G) IL-17F gene-targeting strategy for the generation of the IL-17F deficient mouse strain. A reporter gene/resistance cassette (*lacZ* gene and a Ub1-Em7 promoter driven neomycin resistance gene, *neo*, flanked by loxP sites, ►) was introduced into *il17f* exon 2 and 3 of a BAC containing the IL-17F gene locus. 129S6SvEv/C57B/6F1 embryonic stem cells were

targeted with a BAC carrying the replaced *il17f* gene locus and were subsequently screened as described elsewhere (41). “a” and “b” represent amplicons for the wild type and targeted allele respectively. Complete loss of IL-17F in the IL-17<sup>null</sup> mouse was confirmed by ELISA on supernatant of T<sub>H</sub>17 polarized splenocytes.

**Supplemental Figure 2 Specification of the IL-17A blocking capacity of *in vivo* applied antagonistic antibody** (A) WT or IL-17A<sup>-/-</sup> mice (n=3) were immunized with MOG/CFA and pertussis toxin. On day 0 and 4 either 200mg of antagonistic anti-IL-17A antibody or isotype control antibody (rat IgG1) was administered intraperitoneally and mice are bled on day 7. The recovered serum was titrated in an IL-17A specific ELISA onto 1000 pg of IL-17A protein standard. The serum was serially diluted as shown in the graph. To estimate the anti-IL-17A titer in the serum the neutralizing antibody was itself in parallel titrated onto the same amount of IL-17A protein standard. IL-17A levels were measured after a 1 hour pre-incubation of the serum/antibody with the IL-17A standard. The graph shows the pooled data of all anti-IL-17A and rat IgG1 sera with SEM indicated. (B) Two groups of CD4-IL17A<sup>ind/+</sup> littermate mice were immunized with MOG/CFA (n=3). After 10 days, either 100µg/mouse of anti-IL-17A or sham antibody was injected intravenously. Mice were subsequently bled and serum was isolated either 3h or 18h after the antibody treatment. IL-17A serum concentrations were measured by flow cytometric cytokine analysis. Statistical significances are indicated in the graph (one-tailed T test).

**Supplemental Table 1 Homeostatic leukocyte composition in spleen and thymus of naïve CD4-IL17A<sup>ind/+</sup> and control mice.**

| SPLEEN                                       | Percentage                 |                         |
|----------------------------------------------|----------------------------|-------------------------|
|                                              | CD4-IL17A <sup>ind/+</sup> | IL-17A <sup>ind/+</sup> |
| T <sub>H</sub> cells (CD4 <sup>+</sup> )     | 18                         | 19                      |
| CTL (CD8 <sup>+</sup> )                      | 9                          | 11                      |
| T <sub>Reg</sub> cells (FoxP3 <sup>+</sup> ) | 2                          | 2                       |
| NK cells (NK1.1 <sup>+</sup> )               | 5                          | 5                       |
| B cells (B220 <sup>+</sup> )                 | 59                         | 60                      |
| Macrophages (CD11b <sup>+</sup> )            | 6                          | 5                       |
| DC (CD11c <sup>+</sup> )                     | 6                          | 4                       |

  

| THYMUS                               | Percentage                 |                         |
|--------------------------------------|----------------------------|-------------------------|
|                                      | CD4-IL17A <sup>ind/+</sup> | IL-17A <sup>ind/+</sup> |
| T <sub>H</sub> (CD4 <sup>+</sup> )   | 15                         | 16                      |
| CTL (CD8 <sup>+</sup> )              | 6                          | 7                       |
| Double positive T <sub>H</sub> cells | 73                         | 73                      |

**Supplemental Table 2 Homeostatic leukocyte composition in spleen and thymus of naïve IL-17F deficient and control mice.**

| SPLEEN                                              | Percentage |     |     |
|-----------------------------------------------------|------------|-----|-----|
|                                                     | +/+        | +/- | -/- |
| T <sub>H</sub> cells (CD4 <sup>+</sup> )            | 14         | 16  | 14  |
| CTL (CD8 <sup>+</sup> )                             | 20         | 21  | 23  |
| T <sub>Reg</sub> cells (FoxP3 <sup>+</sup> )        | 3          | 3   | 2   |
| NK cells (CD3 <sup>-</sup> , NK1.1 <sup>+</sup> )   | 3          | 4   | 3   |
| NK T cells (CD3 <sup>+</sup> , NK1.1 <sup>+</sup> ) | 2          | 3   | 2   |
| B cells                                             | 38         | 38  | 37  |
| Macrophages (CD11b <sup>+</sup> )                   | 4          | 4   | 4   |
| DC (CD11c <sup>+</sup> )                            | 4          | 4   | 3   |

  

| THYMUS                               | Percentage |     |     |
|--------------------------------------|------------|-----|-----|
|                                      | +/+        | +/- | -/- |
| T <sub>H</sub> (CD4 <sup>+</sup> )   | 14         | 15  | 13  |
| CTL (CD8 <sup>+</sup> )              | 5          | 6   | 4   |
| Double positive T <sub>H</sub> cells | 78         | 78  | 80  |
